# Supplementary material for: Colorimetric sensing of chromium(vi) ions in aqueous solution based on the leaching of protein-stabled gold nanoparticles
Source: Royal Society of Chemistry journal article supplement (doi:10.1039/c6ay01200k), 2016-01-01
Supplement: c6ay01200k1.pdf [file c6ay01200k1.pdf]

## Supporting Information

### Colorimetric sensing of Chromium(VI) ions in aqueous solution based on the leaching of protein-stabled gold nanoparticles

Guo Jian-feng<sup>1</sup>, Hou Chang-jun<sup>1,2,a</sup>, Yang Mei<sup>1,a</sup>, Huo Dan-qun<sup>1</sup>, Li Jun-jie<sup>1</sup>, Fa Huan-bao<sup>3</sup>, Luo Hui-bo<sup>4</sup>, Yang Ping<sup>5</sup>

<sup>1</sup>Key Laboratory of Biorheology Science and Technology, Ministry of Education, College of Bioengineering, Chongqing University, Chongqing, 400044, China

<sup>2</sup>National Key Laboratory of Fundamental Science of Micro/Nano-Device and System Technology, Chongqing University, Chongqing, 400044, China

<sup>3</sup>College of Chemistry and Chemical Engineering, Chongqing University, Chongqing, 400044, China

<sup>4</sup>Liquor Making Bio-Technology & Application of Key Laboratory of Sichuan Province, Zigong 643000, China

<sup>5</sup>National Engineering Research Center of Solid-State Brewing, Luzhou Laojiao Group Co. Ltd., Luzhou, Sichuan, 646000, China

<sup>a</sup>Corresponding author. Tel.: +862365112673; fax: +862365102507.

E-mail address: houcj@cqu.edu.cn (C.J. Hou), yangmei@cqu.edu.cn (M. Yang)

## Figure captions

Fig. S1 Effect of the pH on the stability of Au NPs and BSA-Au NPs

Fig. S2 Effect of the concentration of BSA on the stability of Au NPs solution (pH=1)

Fig. S3 Zeta potential of Au NPs(A) and BSA-Au NPs(B) solution (pH=1)

Fig. S4 Effect of pH on the SPR absorption changes of Au NPs (conditions: 40  $\mu\text{M}$  of Cr (VI) ions, 0.8 M of HBr, 6 min).

Fig. S5 Effect of concentrations of HBr on the SPR absorption changes of BSA-Au NPs (conditions: 20  $\mu\text{M}$  of Cr (VI) ions, pH=1, 6 min at 75°C).

Fig. S6 The stability of BSA-Au NPs incubated at different temperature

Fig. S7 Effect of temperature on the SPR absorption changes of BSA-Au NPs (Conditions: 50  $\mu\text{M}$  of Cr (VI) ions, 0.8 M of HBr, 6 min).

Fig. S8 The reaction rate with Cr (VI) of BSA-Au NPs at different temperature

Fig. S9 Effect of time on the SPR absorption changes of BSA-Au NPs (Conditions: 50  $\mu\text{M}$  of Cr (VI) ions, 0.8 M of HBr, 75°C).

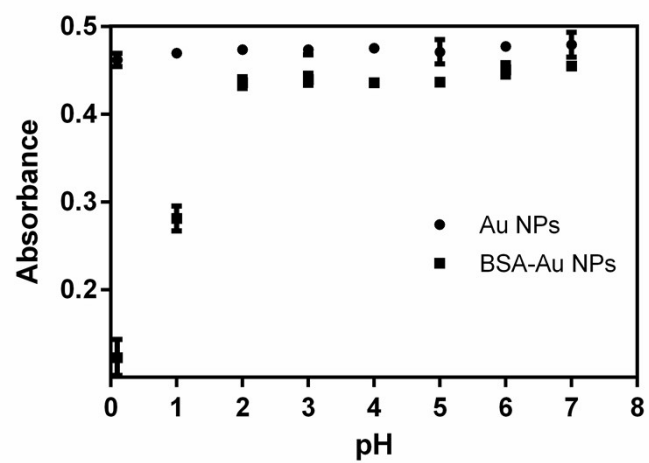

Fig. S1 Effect of the pH on the stability of Au NPs and BSA-Au NPs

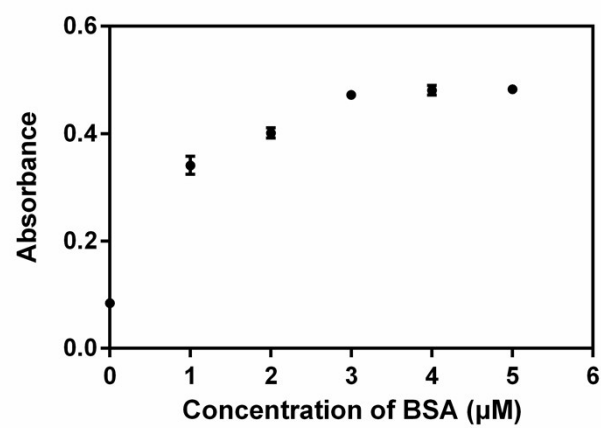

Fig. S2 Effect of the concentration of BSA on the stability of Au NPs solution (pH=1)

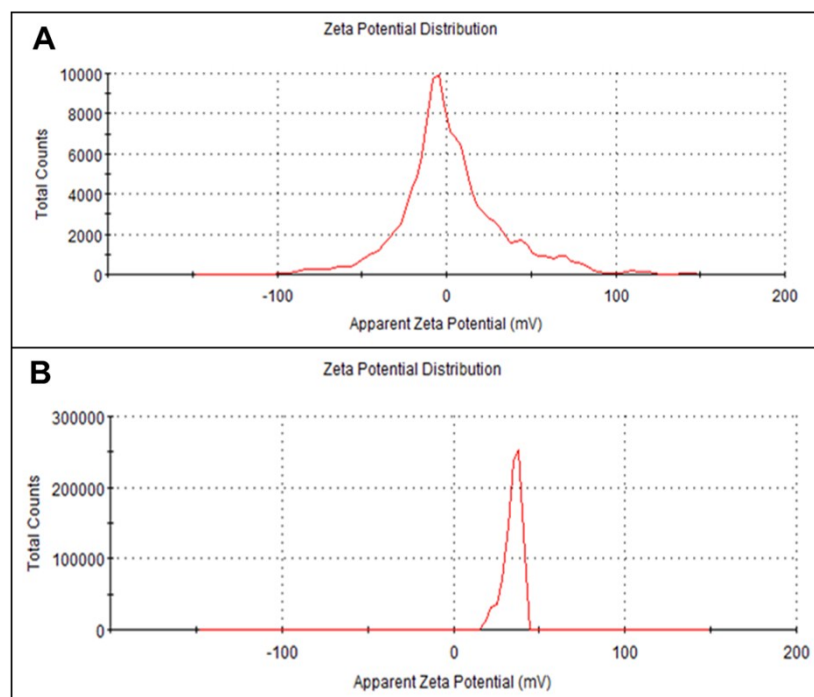

Fig. S3 Zeta potential of Au NPs(A) and BSA-Au NPs(B) solution (pH=1)

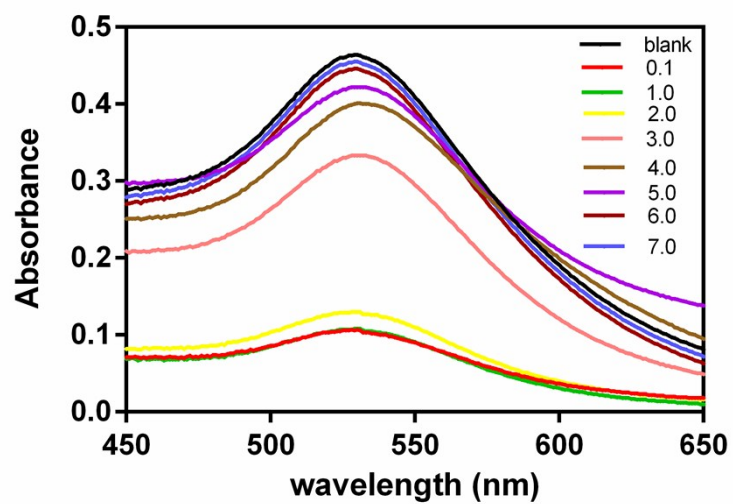

Fig. S4 Effect of pH on the SPR absorption changes of Au NPs (conditions: 40  $\mu$ M of Cr (VI) ions, 0.8 M of HBr, 6 min).

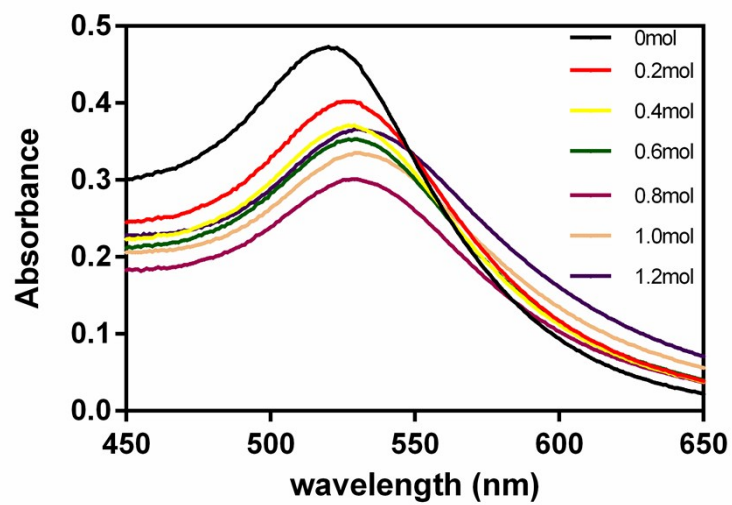

Fig. S5 Effect of concentrations of HBr on the SPR absorption changes of BSA-Au NPs (conditions: 20  $\mu$ M of Cr (VI) ions, pH=1, 6 min at 75°C).

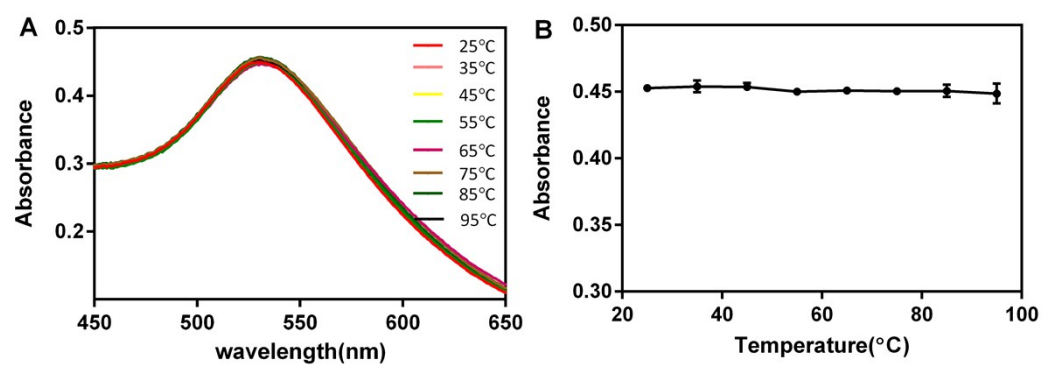

Fig. S6 The stability of BSA-Au NPs incubated at different temperature

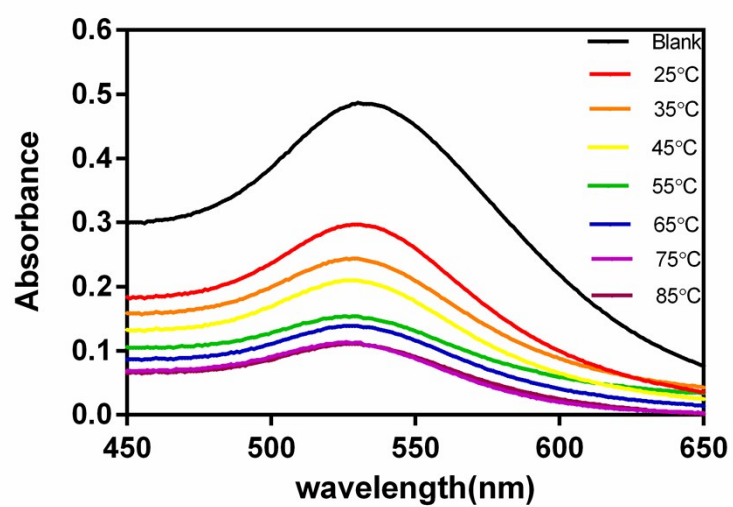

Fig. S7 Effect of temperature on the SPR absorption changes of BSA-Au NPs (Conditions: 50  $\mu$ M of Cr (VI) ions, 0.8 M of HBr, 6 min).

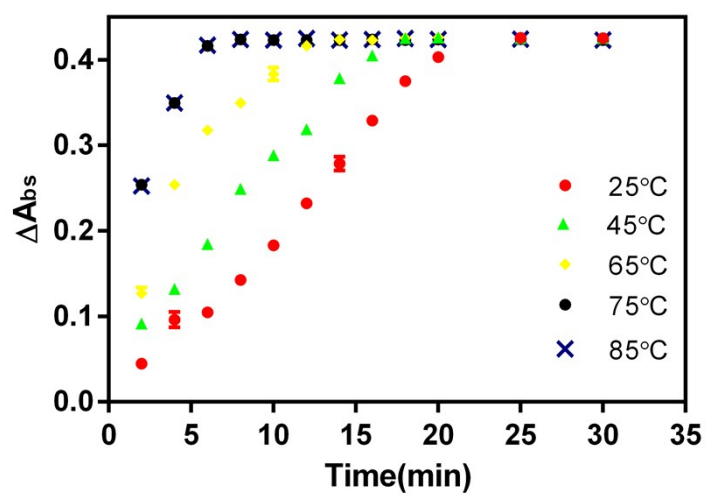

Fig. S8 The reaction rate with Cr (VI) of BSA-Au NPs at different temperature

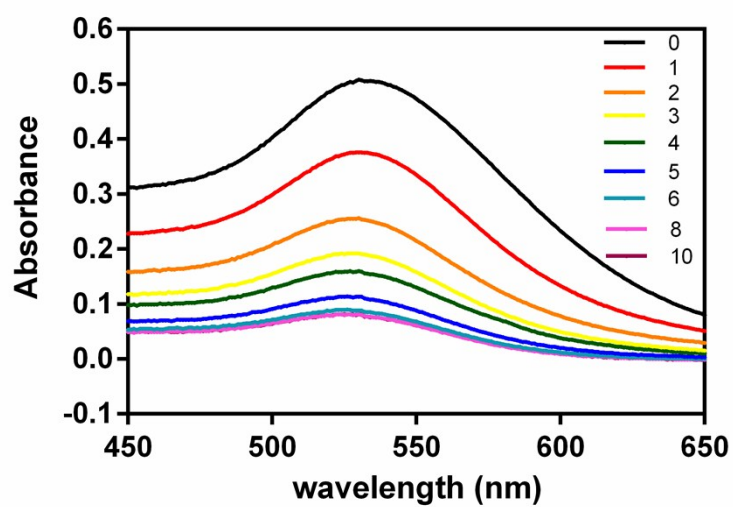

Fig. S9 Effect of time on the SPR absorption changes of BSA-Au NPs (Conditions: 50  $\mu$ M of Cr (VI) ions, 0.8 M of HBr, 75°C).
